# Supplementary material
Source: MDPI journal article supplement (https://www.mdpi.com/2076-3417/11/21/10010)
Supplement: s1 [file s1]

## Supplementary material

Table S1. Composition of the studied ceramic mixtures

| Sample                                                                  | Clay (%) | WS (%) | FSD (%) |
|-------------------------------------------------------------------------|----------|--------|---------|
| Laboratory trial with Ci=C1, C2 and C3 clays                            |          |        |         |
| LCi                                                                     | 100      | 0      | 0       |
| LCiW40F0                                                                | 60       | 40     | 0       |
| LCiW20F0                                                                | 80       | 20     | 0       |
| LCiW0F20                                                                | 80       | 0      | 20      |
| LCiW0F40                                                                | 60       | 0      | 40      |
| LCiW20F20                                                               | 60       | 20     | 20      |
| LCiW26F6                                                                | 66.6     | 26.66  | 6.66    |
| LCiW6F6                                                                 | 86.6     | 6.66   | 6.66    |
| LCiW6F26                                                                | 66.6     | 6.66   | 26.66   |
| LCiW13F13                                                               | 73.33    | 13.33  | 13.33   |
| Semi-industrial trial with C1 clay and 8% of wood pulp                  |          |        |         |
| SC1                                                                     | 92       | 0      | 0       |
| SC1W10                                                                  | 82       | 10     | 0       |
| SC1 W20                                                                 | 72       | 20     | 0       |
| SC1W25                                                                  | 67       | 25     | 0       |
| SC1W30                                                                  | 62       | 30     | 0       |
| SC1W35                                                                  | 57       | 35     | 0       |
| SC1W40                                                                  | 52       | 40     | 0       |
| SC1W5F15                                                                | 72       | 5      | 15      |
| SC1W10F10                                                               | 72       | 10     | 10      |
| SC1W15F5                                                                | 72       | 15     | 5       |
| SC1W5F25                                                                | 62       | 5      | 25      |
| SC1W10F20                                                               | 62       | 10     | 20      |
| SC1 W15F15                                                              | 62       | 15     | 15      |
| SC1W20F10                                                               | 62       | 20     | 10      |
| SC1W25F5                                                                | 62       | 25     | 5       |
| SC1W5F35                                                                | 52       | 5      | 35      |
| SC1W10F30                                                               | 52       | 10     | 30      |
| SC1 W15F25                                                              | 52       | 15     | 25      |
| SC1W20F20                                                               | 52       | 20     | 20      |
| SC1W25F15                                                               | 52       | 25     | 15      |
| SC1W30F10                                                               | 52       | 30     | 10      |
| SC1W35F5                                                                | 52       | 35     | 5       |
| Industrial trial of Ceramic Blocks with C4 clay                         |          |        |         |
| IC4                                                                     | 100      | 0      | 0       |
| IC4W20                                                                  | 80       | 20     | 0       |
| Industrial trial of lightweight bricks with C1 clay and 8% of wood pulp |          |        |         |
| IC1                                                                     | 92       | 0      | 0       |
| IC1W30                                                                  | 62       | 30     | 0       |

Table S2. Results of the 14 analysed variables obtained in the 30 samples of laboratory pieces. The Inert landfill and the non-hazardous landfill limits from the European Waste Landfill Council Decision are included at the bottom.

| Property                           | Technical properties |       |       |       |       |                      | Release at equilibrium leaching tests, L/S=10 |      |       |        |       |       |       |       |
|------------------------------------|----------------------|-------|-------|-------|-------|----------------------|-----------------------------------------------|------|-------|--------|-------|-------|-------|-------|
|                                    | WA                   | MOR   | OP    | LFS   | WL    | D                    | As                                            | Ba   | Cd    | Cr     | Cu    | Mo    | Ni    | Zn    |
| Sample                             | (%)                  | (MPa) | (%)   | (%)   | (%)   | (g/cm <sup>3</sup> ) | ----- (mg/kg) -----                           |      |       |        |       |       |       |       |
| LC1W40F0                           | 13.63                | 9.03  | 28.99 | -1.69 | 8.13  | 2.28                 | 0.023                                         | 1.28 | 0.012 | 10.85  | 0.025 | 12.47 | 0.013 | 0.096 |
| LC1W20F0                           | 12.72                | 11.36 | 24.99 | -0.58 | 10.87 | 2.13                 | 0.027                                         | 1.25 | 0.011 | 7.69   | 0.014 | 8.39  | 0.013 | 0.12  |
| LC1                                | 13.75                | 11.29 | 18.62 | 0.28  | 13.97 | 1.96                 | 0.021                                         | 1.13 | 0.019 | 3.19   | 0.023 | 0.56  | 0.016 | 0.098 |
| LC1W0F20                           | 13.81                | 9.84  | 29.96 | 0.48  | 17.17 | 1.82                 | 0.013                                         | 0.75 | 0.006 | 2.24   | 0.024 | 0.44  | 0.016 | 0.13  |
| LC1W0F40                           | 17.09                | 6.45  | 33.06 | 0.88  | 18.90 | 1.70                 | 0.017                                         | 0.67 | 0.008 | 1.57   | 0.014 | 0.37  | 0.019 | 0.22  |
| LC1W20F20                          | 13.63                | 10.4  | 31.09 | 0.03  | 13.44 | 2.01                 | 0.021                                         | 1.18 | 0.001 | 6.12   | 0.016 | 7.9   | 0.015 | 0.12  |
| LC1W26F6                           | 12.11                | 11.26 | 28.45 | -0.72 | 11.26 | 2.11                 | 0.021                                         | 1.71 | 0.008 | 7.07   | 0.022 | 8.25  | 0.022 | 0.15  |
| LC1W6F6                            | 12.93                | 12.46 | 22.77 | 0.17  | 14.32 | 1.96                 | 0.003                                         | 1.08 | 0.001 | 4.19   | 0.014 | 3.03  | 0.027 | 0.11  |
| LC1W6F26                           | 15.05                | 9.21  | 25.11 | 0.44  | 16.45 | 1.85                 | 0.002                                         | 1.21 | 0.001 | 3.64   | 0.016 | 2.7   | 0.011 | 0.093 |
| LC1W13F13                          | 13.72                | 10.62 | 24.48 | 0.17  | 13.97 | 1.98                 | 0.012                                         | 1.27 | 0.013 | 4.89   | 0.016 | 4.69  | 0.014 | 0.13  |
| LC2W40F0                           | 10.20                | 9.75  | 23.99 | -1.13 | 4.85  | 2.32                 | 0.029                                         | 1.44 | 0.013 | 9.31   | 0.021 | 17.88 | 0.015 | 0.23  |
| LC2W20F0                           | 8.84                 | 14.14 | 21.03 | 0.55  | 6.75  | 2.27                 | 0.10                                          | 1.55 | 0.011 | 1.92   | 0.017 | 14.88 | 0.017 | 0.16  |
| LC2                                | 8.33                 | 15.59 | 17.47 | 2.17  | 9.65  | 2.16                 | 0.13                                          | 0.83 | 0.011 | 0.035  | 0.017 | 0.31  | 0.014 | 0.13  |
| LC2W0F20                           | 8.25                 | 14.40 | 22.48 | 2.70  | 12.62 | 2.02                 | 0.30                                          | 0.11 | 0.001 | 0.038  | 0.015 | 0.27  | 0.014 | 0.26  |
| LC2W0F40                           | 11.45                | 6.76  | 27.79 | 2.98  | 15.91 | 1.87                 | 0.451                                         | 0.10 | 0.001 | 0.0224 | 0.023 | 0.23  | 0.018 | 0.13  |
| LC2W20F20                          | 10.61                | 10.95 | 25.87 | 0.73  | 10.85 | 2.10                 | 0.13                                          | 1.40 | 0.009 | 1.13   | 0.019 | 13.1  | 0.024 | 0.14  |
| LC2W26F6                           | 10.19                | 11.07 | 25.01 | 0.24  | 7.14  | 2.23                 | 0.074                                         | 1.38 | 0.009 | 3.78   | 0.021 | 14.67 | 0.018 | 0.20  |
| LC2W6F6                            | 8.39                 | 15.38 | 21.04 | 2.24  | 10.30 | 2.17                 | 0.19                                          | 0.68 | 0.001 | 0.35   | 0.020 | 3.92  | 0.016 | 0.14  |
| LC2W6F26                           | 10.55                | 11.75 | 26.83 | 2.19  | 13.54 | 1.98                 | 0.17                                          | 0.75 | 0.018 | 0.72   | 0.017 | 4.37  | 0.027 | 0.15  |
| LC2W13F13                          | 9.79                 | 12.90 | 24.05 | 1.47  | 10.10 | 2.10                 | 0.14                                          | 1.17 | 0.005 | 1.75   | 0.019 | 8.09  | 0.037 | 0.15  |
| LC3W40F0                           | 6.64                 | 10.09 | 22.37 | -0.91 | 4.14  | 2.40                 | 0.063                                         | 1.24 | 0.016 | 1.38   | 0.032 | 17.13 | 0.016 | 0.22  |
| LC3W20F0                           | 6.72                 | 11.31 | 18.61 | -0.18 | 5.24  | 2.31                 | 0.16                                          | 1.67 | 0.025 | 1.07   | 0.022 | 13.9  | 0.017 | 0.28  |
| LC3                                | 8.02                 | 10.57 | 14.62 | 0.65  | 6.21  | 2.21                 | 0.39                                          | 0.14 | 0.031 | 0.046  | 0.025 | 0.43  | 0.014 | 0.24  |
| LC3W0F20                           | 7.22                 | 9.72  | 19.28 | 1.65  | 10.73 | 2.04                 | 0.33                                          | 0.12 | 0.007 | 0.036  | 0.028 | 0.27  | 0.015 | 0.24  |
| LC3W0F40                           | 10.13                | 6.56  | 25.25 | 1.66  | 15.03 | 1.83                 | 0.29                                          | 0.12 | 0.034 | 0.033  | 0.026 | 0.32  | 0.016 | 0.24  |
| LC3W20F20                          | 8.36                 | 10.54 | 25.10 | 0.25  | 9.69  | 2.10                 | 0.14                                          | 1.53 | 0.013 | 0.95   | 0.020 | 14.26 | 0.015 | 0.12  |
| LC3W26F6                           | 7.17                 | 11.65 | 23.63 | -0.19 | 5.88  | 2.31                 | 0.10                                          | 1.38 | 0.020 | 1.08   | 0.029 | 15.26 | 0.018 | 0.16  |
| LC3W6F6                            | 6.11                 | 11.81 | 16.82 | 1.12  | 6.99  | 2.25                 | 0.24                                          | 0.70 | 0.025 | 0.62   | 0.022 | 9.08  | 0.029 | 0.21  |
| LC3W6F26                           | 7.25                 | 12.22 | 22.16 | 0.73  | 7.55  | 2.20                 | 0.24                                          | 0.77 | 0.021 | 0.49   | 0.023 | 9.49  | 0.016 | 0.18  |
| LC3W13F13                          | 7.43                 | 11.22 | 22.05 | 0.29  | 8.54  | 2.15                 | 0.15                                          | 1.35 | 0.016 | 0.65   | 0.028 | 6.01  | 0.017 | 0.24  |
| Inert landfill                     |                      |       |       |       |       |                      | 0.5                                           | 20   | 0.04  | 0.5    | 2     | 0.5   | 0.4   | 4     |
| Waste Landfill Criteria (EU, 2003) |                      |       |       |       |       |                      | Non-hazardous landfill                        |      |       |        |       |       |       |       |
|                                    |                      |       |       |       |       |                      | 2                                             | 100  | 1     | 10     | 50    | 10    | 10    | 50    |

Table S3. Results of the 14 analysed variables obtained in the 22 samples of semi-industrial prototypes. The Inert landfill and the non-hazardous landfill limits from the European Waste Landfill Council Decision are included at the bottom.

| Property<br>Sample                 | Technical properties |       |       |      |       |                        | Equilibrium leaching tests,<br>L/S ratio = 2 |      |      |       | Equilibrium leaching tests,<br>L/S ratio = 10 |      |      |       |
|------------------------------------|----------------------|-------|-------|------|-------|------------------------|----------------------------------------------|------|------|-------|-----------------------------------------------|------|------|-------|
|                                    | WA                   | MOR   | OP    | LFS  | WL    | D                      | As2                                          | Ba2  | Cr2  | Mo2   | As10                                          | Ba10 | Cr10 | Mo10  |
|                                    | (%)                  | (MPa) | (%)   | (%)  | (%)   | (g/cm <sup>3</sup> )   | (mg/kg)                                      |      |      |       |                                               |      |      |       |
| SC1                                | 16.60                | 7.2   | 41.75 | 3.16 | 8.01  | 1.38                   | 0.0004                                       | 0.40 | 1.34 | 0.04  | 0.002                                         | 1.42 | 2.3  | 0.20  |
| SC1W10                             | 15.71                | 4.77  | 37.33 | 1.8  | 13.53 | 1.51                   | 0.0004                                       | 0.06 | 1.41 | 1.31  | 0.08                                          | 0.02 | 2.14 | 0.20  |
| SC1 W20                            | 13.42                | 5.89  | 35.32 | 2.12 | 10.98 | 1.63                   | 0.0004                                       | 0.11 | 0.39 | 2.23  | 0.06                                          | 0.52 | 0.66 | 0.20  |
| SC1W25                             | 9.91                 | 7.09  | 34.71 | 1.88 | 6.03  | 1.75                   | 0.0004                                       | 0.17 | 0.82 | 4.09  | 0.05                                          | 0.81 | 1.29 | 7.91  |
| SC1W30                             | 12.14                | 5.85  | 32.32 | 1.59 | 8.51  | 1.75                   | 0.01                                         | 0.21 | 0.67 | 5.27  | 0.002                                         | 0.86 | 1.33 | 10.04 |
| SC1W35                             | 10.53                | 4.27  | 36.86 | 2.28 | 6.58  | 1.78                   | 0.0004                                       | 0.29 | 1.66 | 7.71  | 0.002                                         | 1.75 | 3.82 | 17.67 |
| SC1W40                             | 12.67                | 4.27  | 38.92 | 1.96 | 7.23  | 1.77                   | 0.01                                         | 0.29 | 2.38 | 13.28 | 0.002                                         | 1.87 | 3.88 | 16.76 |
| SC1W5F15                           | 12.42                | 6.24  | 30.61 | 2.48 | 10.37 | 1.65                   | 0.01                                         | 0.13 | 1.53 | 3.69  | 0.07                                          | 0.64 | 2.94 | 7.82  |
| SC1W10F10                          | 10.64                | 6.19  | 34.62 | 2.40 | 8.06  | 1.67                   | 0.01                                         | 0.16 | 1.26 | 3.22  | 0.06                                          | 0.52 | 2.02 | 6.20  |
| SC1W15F5                           | 11.95                | 7.12  | 34.56 | 2.44 | 10.37 | 1.68                   | 0.01                                         | 0.15 | 1.07 | 3.66  | 0.06                                          | 0.66 | 1.58 | 8.55  |
| SC1W5F25                           | 9.71                 | 5.77  | 29.89 | 2.79 | 6.37  | 1.74                   | 0.01                                         | 0.13 | 0.55 | 1.75  | 0.10                                          | 0.46 | 0.77 | 0.20  |
| SC1W10F20                          | 12.57                | 6.24  | 31.67 | 2.68 | 9.40  | 1.66                   | 0.0004                                       | 0.17 | 0.56 | 2.8   | 0.002                                         | 0.63 | 1.01 | 6.01  |
| SC1 W15F15                         | 12.45                | 7.76  | 30.61 | 2.24 | 9.16  | 1.68                   | 0.0004                                       | 0.16 | 1.04 | 3.14  | 0.002                                         | 0.67 | 1.69 | 6.45  |
| SC1W20F10                          | 10.31                | 5.85  | 34.47 | 2.36 | 5.96  | 1.74                   | 0.0004                                       | 0.14 | 1.68 | 3.76  | 0.002                                         | 0.68 | 2.62 | 7.90  |
| SC1W25F5                           | 11.83                | 6.42  | 34.26 | 1.96 | 7.44  | 1.72                   | 0.0004                                       | 0.17 | 1.04 | 4.71  | 0.07                                          | 0.90 | 1.72 | 8.66  |
| SC1W5F35                           | 10.13                | 3.61  | 28.66 | 2.56 | 6.99  | 1.71                   | 0.01                                         | 0.08 | 0.62 | 1.24  | 0.06                                          | 0.24 | 0.61 | 0.20  |
| SC1W10F30                          | 10.25                | 4.77  | 29.01 | 2.56 | 6.44  | 1.75                   | 0.0004                                       | 0.09 | 0.41 | 2.05  | 0.002                                         | 0.33 | 0.68 | 0.20  |
| SC1 W15F25                         | 11.30                | 5.86  | 32.14 | 2.12 | 5.34  | 1.74                   | 0.01                                         | 0.10 | 0.86 | 2.75  | 0.04                                          | 0.24 | 1.12 | 0.20  |
| SC1W20F20                          | 12.82                | 4.79  | 32.11 | 2.44 | 8.47  | 1.67                   | 0.01                                         | 0.16 | 0.41 | 3.90  | 0.06                                          | 0.61 | 0.90 | 7.38  |
| SC1W25F15                          | 10.96                | 4.86  | 33.67 | 2.44 | 6.48  | 1.72                   | 0.01                                         | 0.23 | 1.10 | 6.14  | 0.06                                          | 0.85 | 1.85 | 10.91 |
| SC1W30F10                          | 10.01                | 5.03  | 32.85 | 2.32 | 4.14  | 1.77                   | 0.01                                         | 0.22 | 1.32 | 5.33  | 0.05                                          | 1.26 | 2.36 | 11.57 |
| SC1W35F5                           | 8.12                 | 4.98  | 33.41 | 1.76 | 4.65  | 1.99                   | 0.01                                         | 0.17 | 3.02 | 5.84  | 0.05                                          | 0.99 | 4.18 | 13.57 |
| Waste Landfill Criteria (EU, 2003) |                      |       |       |      |       | Inert landfill         | 0.1                                          | 7    | 0.2  | 0.3   | 0.5                                           | 20   | 0.5  | 0.5   |
|                                    |                      |       |       |      |       | Non-hazardous landfill | 0.4                                          | 30   | 4    | 5     | 2                                             | 100  | 10   | 10    |

Table S4. Results of the 12 analysed variables obtained in the 4 samples of industrial products. The Inert landfill and the non-hazardous landfill limits from the European Waste Landfill Council Decision are included at the bottom.

| Property<br>Sample                 | Technical properties |       |       |                        | Equilibrium leaching tests,<br>L/S ratio = 2 |      |      |      | Equilibrium leaching tests, L/S<br>ratio = 10 |      |       |      |
|------------------------------------|----------------------|-------|-------|------------------------|----------------------------------------------|------|------|------|-----------------------------------------------|------|-------|------|
|                                    | WA                   | MOR   | OP    | D                      | As2                                          | Ba2  | Cr2  | Mo2  | As10                                          | Ba10 | Cr10  | Mo10 |
|                                    | (%)                  | (MPa) | (%)   | (g/cm <sup>3</sup> )   | (mg/kg)                                      |      |      |      |                                               |      |       |      |
| IC4                                | 12.80                | 16.2  | 32.74 | 1.78                   | 0.0004                                       | 0.26 | 0.32 | 0.04 | 0.002                                         | 0.04 | 0.024 | 0.20 |
| IC4W20                             | 9.81                 | 16.5  | 32.40 | 1.88                   | 0.0004                                       | 0.26 | 0.42 | 1.38 | 0.002                                         | 1.10 | 0.024 | 6.0  |
| IC1                                | 12.72                | 8.4   | 30.29 | 1.69                   | 0.0004                                       | 0.24 | 1.72 | 0.04 | 0.002                                         | 1.10 | 2.90  | 0.20 |
| IC1W30                             | 14.10                | 9.5   | 35.86 | 1.96                   | 0.0004                                       | 0.24 | 3.94 | 4.66 | 0.002                                         | 1.10 | 5.60  | 10.0 |
| Waste Landfill Criteria (EU, 2003) |                      |       |       | Inert landfill         | 0.1                                          | 7    | 0.2  | 0.3  | 0.5                                           | 20   | 0.5   | 0.5  |
|                                    |                      |       |       | Non-hazardous landfill | 0.4                                          | 30   | 4    | 5    | 2                                             | 100  | 10    | 10   |
